1 **LGR6 is necessary for attaining peak bone mass and regulates osteogenesis through**  
2 **differential ligand use**

3

4 Vikram Khedgikar<sup>1</sup>, Julia F. Charles<sup>1,2</sup>, and Jessica A. Lehoczky<sup>1,3</sup>

5

6 <sup>1</sup>Department of Orthopedic Surgery, Brigham and Women's Hospital, Boston, MA, 02115, USA

7 <sup>2</sup>Department of Medicine, Brigham and Women's Hospital, Boston, MA, 02115, USA

8 <sup>3</sup>Corresponding author: Jessica A. Lehoczky, PhD; Department of Orthopedics, Brigham and

9 Women's Hospital, 60 Fenwood Rd., Hale BTM 5016, Boston, MA 02115, USA; tel: (857) 307-

10 5416; email: [jlehoczky@bwh.harvard.edu](mailto:jlehoczky@bwh.harvard.edu)

11

12 AUTHOR CONTRIBUTIONS: VK and JAL conceptualized and designed experiments. VK

13 performed experiments and acquired data. VK, JFC, and JAL analyzed data. VK and JAL wrote

14 the manuscript which was edited by all authors.

15

16 RUNNING TITLE: Lgr6 regulates osteogenesis and bone mass in mice

17 **ABSTRACT**

18 Leucine-rich repeat containing G-protein-coupled receptor 6 (LGR6) is a marker of  
19 osteoprogenitor cells and is dynamically expressed during in vitro osteodifferentiation of mouse  
20 and human mesenchymal stem cells (MSCs). While the Lgr6 genomic locus has been associated  
21 with osteoporosis in human cohorts, the precise molecular function of LGR6 in osteogenesis and  
22 maintenance of bone mass are not yet known. In this study, we performed in vitro Lgr6  
23 knockdown and overexpression experiments in murine osteoblastic cells and find decreased Lgr6  
24 levels results in reduced osteoblast proliferation, differentiation, and mineralization. Consistent  
25 with these data, overexpression of Lgr6 in these cells leads to significantly increased  
26 proliferation and osteodifferentiation. To determine whether these findings are recapitulated in  
27 vivo, we performed microCT and ex vivo osteodifferentiation analyses using our newly  
28 generated CRISPR-Cas9 mediated Lgr6 mouse knockout allele (Lgr6-KO). We find that ex vivo  
29 osteodifferentiation of Lgr6-KO primary MSCs is significantly reduced, and 8 week-old Lgr6-  
30 KO mice have less trabecular bone mass as compared to Lgr6 wildtype controls, indicating that  
31 Lgr6 is necessary for normal osteogenesis and to attain peak bone mass. Toward mechanism, we  
32 analyzed in vitro signaling in the context of two LGR6 ligands, RSPO2 and MaR1. We find that  
33 RSPO2 stimulates LGR6-mediated WNT/ $\beta$ -catenin signaling whereas MaR1 stimulates LGR6-  
34 mediated cAMP activity, suggesting two ligand-dependent functions for LGR6 receptor  
35 signaling during osteogenesis. Collectively, this study reveals that Lgr6 is necessary for wildtype  
36 levels of proliferation and differentiation of osteoblasts, and achieving peak bone mass.

37

38 **INTRODUCTION**

39 Bone is a dynamic tissue that is continuously remodeled throughout life to maintain its  
40 strength and structural integrity. This remodeling relies on osteoclast mediated resorption of old  
41 or damaged bone and generation of new bone by osteoblasts. Maintenance of bone homeostasis  
42 requires a precise balance of these processes, whereby excess resorption or reduced bone  
43 formation can result in bone diseases such as osteoporosis and associated fragility fractures<sup>1</sup>. It is  
44 estimate that over 10 million people in the U.S. have osteoporosis, a diagnosis that is heavily  
45 skewed towards post-menopausal women<sup>2</sup>. This diagnosis has a strong correlation with fragility  
46 fractures; as many as half of women over the age of 50 are at risk for age-related bone  
47 fractures<sup>2,3</sup>. Antiresorptive drugs can stabilize bone mass and reduce fracture risk in osteoporosis  
48 patients<sup>4</sup>. While clinically effective, these drugs have drawbacks including side effects,  
49 discontinuation rebound resorption, and ineffectiveness in directly stimulating new bone  
50 growth<sup>4-6</sup>. Existing anabolic therapies can be successful in stimulating new bone growth;  
51 however, their effects decrease over time and gains in bone mass are lost after discontinuation<sup>7,8</sup>.  
52 Off target effects including cardiovascular complications and the potential for cancer are also a  
53 concern<sup>9-11</sup>. It follows that there is a significant need to develop new anabolic therapies, which  
54 requires identification of new targets and increased understanding of the molecular signaling in  
55 osteogenesis. Leucine-rich repeat containing G-protein-coupled receptor 6 (LGR6) as described  
56 in this report represents a new molecular target toward this goal.

57 LGR6 is a 7-transmembrane G-protein-coupled receptor that has been identified as a  
58 marker of adult progenitor cell populations in diverse tissues including skin, nail, lung, and  
59 bone<sup>12-15</sup>. Previously, we demonstrated that Lgr6 is a marker of osteoprogenitors in mice and is  
60 dynamically expressed during in vitro osteodifferentiation of mesenchymal stem cells (MSCs),  
61 suggesting an osteogenic function<sup>13,14</sup>. These findings translate to human osteogenesis in that

62 Lgr6 is also dynamically expressed during in vitro osteodifferentiation of human MSCs and  
63 osteoblasts<sup>16,17</sup>. Importantly, existing data support a function for LGR6 in bone homeostasis and  
64 repair; Lgr6 is necessary for mouse digit bone regeneration, and targeted gene sequencing of  
65 postmenopausal Chinese women found Lgr6 to be associated with osteoporosis<sup>13,18</sup>.

66 There are two defined ligands for the LGR6 receptor: R-spondin proteins (RSPOs:  
67 RSPO1, RSPO2, RSPO3, and RSPO4) and the lipid metabolite maresin-1 (MaR1), though these  
68 ligand-receptor interactions have not yet been explicitly defined in bone<sup>19,20</sup>. RSPO bound LGR6  
69 agonizes WNT signaling, and while all four RSPOs can potentiate this signaling, in vitro studies  
70 find RSPO2 binds LGR6 with the highest affinity<sup>19</sup>. The structural interaction and downstream  
71 signaling has not yet been described specifically in bone, but data from each protein alone  
72 support the putative interaction. Overexpression of Lgr6 in MC3T3-E1 cells increases WNT/ $\beta$ -  
73 catenin signaling and differentiation of osteoblasts<sup>21</sup>. Similarly, RSPO2 has an anabolic effect on  
74 osteoblasts in vitro, and Ocn-cre;Rspo2-flox conditional knockout mice have reduced  
75 osteogenesis and bone mass<sup>22,23</sup>. Beyond WNT signaling, MaR1 bound LGR6 potentiates G-  
76 protein mediated signaling and cAMP activity as was recently defined in the context of  
77 immunoresolution in human and mouse phagocytes<sup>20</sup>. This ligand-receptor signaling interaction  
78 has not yet been reported in other cell types, but MaR1 has been associated with anabolic bone  
79 phenotypes. Using an aged mouse fracture model, MaR1 treatment resulted in improved bone  
80 regeneration, and in a separate study, local application of MaR1 to rat extracted molar sockets  
81 led to accelerated wound healing and alveolar bone regeneration<sup>24,25</sup>. Broadly speaking, WNT  
82 signaling and G-protein/cAMP signaling are essential and well-studied in the context of  
83 osteogenesis<sup>26,27</sup>. We hypothesize that LGR6 is a unique receptor in bone, capable of regulating  
84 both signaling pathways in response to differential ligand use.

85           In this report, we build upon the previous data and use in vitro knockdown and  
86 overexpression of *Lgr6* in immortalized and primary mouse MSCs and calvarial osteoblasts to  
87 provide further evidence that *Lgr6* regulates proliferation, differentiation, and mineralization of  
88 osteoblasts. By immunohistochemistry, we detect LGR6 expressing cells within the bone  
89 marrow as well as on the surface of the femoral trabeculae. Genetic lineage analysis of these  
90 cells reveals they contribute to the osteoblasts of the trabecular surface and the adjacent cortical  
91 bone. Using CRISPR-Cas9, we engineered a new *Lgr6* knockout allele. MicroCT analysis of  
92 mutant and wildtype littermates reveal *Lgr6* knockout mice have significantly reduced trabecular  
93 bone mass. Towards mechanism, we use in vitro signaling assays to show that RSPO2 stimulates  
94 LGR6-mediated WNT/ $\beta$ -catenin signaling and MaR1 stimulates LGR6-mediated cAMP activity,  
95 demonstrating differential ligand-induced signaling during osteogenesis. Taken together, this  
96 study anchors *Lgr6* to osteogenesis and lays the foundation for a novel inroad to anabolic  
97 therapies.

98

## 99 **RESULTS**

### 100 ***Lgr6* regulates MSC proliferation and osteodifferentiation**

101           Previously, we established *Lgr6* as a marker of osteoprogenitors with dynamic expression  
102 during osteogenesis in mice<sup>14</sup>. In line with this, a recent report ties *Lgr6* expression to WNT/ $\beta$ -  
103 catenin signaling and in vitro differentiation of MC3T3E1 immortalized calvarial cells, though  
104 does not explore signaling or function in bone marrow derived MSCs, primary osteoblasts, or in  
105 vivo<sup>21</sup>. Building on these data, to determine if expression of *Lgr6* contributes to the proliferation  
106 or differentiation in primary osteoprogenitors, we used mouse bone marrow derived MSCs. We  
107 first knocked-down endogenous *Lgr6* expression using an in vitro siRNA-mediated approach

108 (Supplemental Figure 1). 24 hours post-transfection, we found an 11% reduction in proliferation  
109 of Lgr6 knockdown cells as compared to control siRNA knockdown cells by WST-1 based cell  
110 proliferation assays ( $p=0.011$ ) (Figure 1a). To determine if Lgr6 is necessary for  
111 osteoblastogenesis in primary MSCs, we used Lgr6 siRNA-mediated knockdown during in vitro  
112 osteodifferentiation and assessed differentiation markers and mineralization. Runx2 expression  
113 was significantly decreased 1 and 3 days post-osteoinduction in Lgr6 knockdown cells compared  
114 to controls (day 1: 46%,  $p=8.53E-05$ ; day 3: 36%,  $p=0.002$ ) (Figure 1b). Similarly, Sp7  
115 expression in Lgr6 knockdown cells was decreased as compared to controls (day 1: 56%,  
116  $p=0.030$ ; day 3: 72%,  $p=0.002$ ) (Figure 1c). We found alkaline phosphatase (ALP) activity was  
117 19% reduced by 7 days post-osteoinduction in Lgr6 knockdown cells as compared to negative  
118 siRNA controls ( $p=0.0016$ ) (Figure 1d). Consistent with this finding, mineralization of Lgr6  
119 knockdown cells was reduced by 16% ( $p=0.016$ ) as determined by quantification of alizarin red  
120 staining (ARS) 18 days post-osteoinduction (Figure 1e). We performed separate Lgr6 siRNA  
121 knockdown experiments in primary mouse calvarial osteoblasts (MCO) to validate our MSC  
122 data. As with MSCs, Lgr6 knockdown MCOs showed reduced proliferation by WST-1 (10%,  
123  $p=0.019$ ) and decreased expression of Runx2 (60%,  $p=0.0006$ ) and Sp7 (38%,  $p=4.66E-05$ ) 2  
124 days post-induction (Supplemental Figure 2a-c). Also consistent with the MSC data, Lgr6  
125 knockdown MCOs had reduced ALP activity (15%,  $p=0.005$ ) and ARS staining (18%,  $p=0.006$ )  
126 at 7 and 21 days post-induction, respectively (Supplemental Figure 2d-e). Collectively, these  
127 data demonstrate that Lgr6 is necessary for normal levels of proliferation and osteodifferentiation  
128 of mouse primary MSCs and MCOs.

129 To complement our Lgr6 transient knockdown experiments, we sought to evaluate the  
130 necessity of Lgr6 for MSC proliferation and osteodifferentiation using a genetic loss of function

131 model. Using our newly generated *Lgr6* mouse knockout allele (see Methods; Supplemental  
132 Figure 3), we generated primary MSCs from the femoral bone marrow of *Lgr6* knockout (*Lgr6*-  
133 KO) and wildtype littermates (*Lgr6*-WT) and assessed their relative proliferation and osteogenic  
134 potential. *Lgr6*-KO cells had reduced proliferation as compared to *Lgr6*-WT MSCs (male=21%,  
135  $p=0.002$ ; female=18%,  $p=0.005$ ) (Figure 1f). Using ex vivo osteodifferentiation assays to assess  
136 differentiation (day 11) and mineralization (days 18-21), we found *Lgr6*-KO cells had reduced  
137 alkaline phosphatase activity (male=19%,  $p=0.011$ ; female=17%,  $p=0.013$ ) and mineralization as  
138 compared to *Lgr6*-WT MSCs (male=23%,  $p=0.004$ ; female=17%,  $p=0.045$ ) (Figure 1g-h). The  
139 finding that knockdown of *Lgr6* led to reduced osteodifferentiation led us to ask whether there  
140 was a broader change in MSC multipotency. Using an immortalized mouse MSC cell line, we  
141 evaluated the ability of C3H10T1/2 cells to undergo chondrogenesis or adipogenesis following  
142 *Lgr6* siRNA-mediated knockdown. Quantification of oil red O staining 12 days post induction of  
143 adipogenesis and alcian blue staining 9 days post induction of chondrogenesis, revealed no  
144 significant difference between the *Lgr6* knockdown and control cells (Supplemental Figure 4).  
145 These data suggest that *Lgr6* is necessary for normal osteogenesis of MSCs, but not adipogenesis  
146 or chondrogenesis.

147

#### 148 ***Lgr6* overexpression enhances osteoblastogenesis in vitro**

149 Having found a necessity for *Lgr6* in osteoblastogenesis, we wanted to determine if  
150 overexpression of *Lgr6* was sufficient to increase MSC proliferation or osteodifferentiation. We  
151 cloned an *Lgr6* overexpression plasmid using the full-length mouse *Lgr6* cDNA (pCAG-*Lgr6*,  
152 from here on referred to p*Lgr6*). Following validation and transfection optimization  
153 (Supplemental Figure 5), we transfected p*Lgr6* and pCAG-GFP (control, from here on referred

154 to pCAG) into MSCs and measured proliferation 24 hours post-transfection. Overexpression of  
155 Lgr6 resulted in a 20% increase in proliferation as compared to the control cells, as determined  
156 by WST-1 assay ( $p=0.033$ ) (Figure 2a). To determine if any changes in osteodifferentiation were  
157 found with overexpression of Lgr6, osteogenic markers were assessed 7 days post-  
158 osteoinduction). While Lgr6 overexpression did not result in increased expression of early  
159 osteogenic markers Runx2 and Sp7 at this stage, it did result in significantly increased mRNA  
160 expression of later markers Alkaline phosphatase (75%,  $p=0.007$ ) and Osteopontin (111%,  
161  $p=3.89E-05$ ) as compared to the pCAG controls (Figure 2b). Consistent with these data, Lgr6  
162 overexpression led to increased ALP activity by day 7 (8%,  $p=0.012$ ) (Figure 2c) and  
163 mineralization was increased at day 21 (10%,  $p=0.034$ ) (Figure 2d). These findings were  
164 corroborated in experiments with primary mouse MCOs, whereby overexpression of Lgr6 led to  
165 significantly increased proliferation (14%,  $p=0.025$ ) and increased ALP activity (8%,  $p=0.026$ )  
166 and mineralization (10%,  $p=0.025$ ) 7 and 21 days post-osteinduction, respectively  
167 (Supplemental Figure 6).

168

### 169 **Lgr6 is necessary to attain peak bone mass in mice**

170 To gain in vivo context to our MSC derived data, we evaluated mouse long bones for the  
171 cellular localization of LGR6 expression. Using the Lgr6 GFP reporter mouse allele<sup>12</sup> (Lgr6-  
172 EGFPcreERT), we evaluated 2-month-old femoral trabeculae by anti-GFP  
173 immunohistochemistry. This staining reveals Lgr6-GFP cells at the periphery of the trabecular  
174 bone marrow (Figure 3a and b). The location and sporadic expression pattern of Lgr6-GFP cells  
175 could be consistent with either osteoblast or osteoclast progenitors, however we do not find them  
176 to co-label with TRAP, indicating they are not osteoclasts (Figure 3a-a’’). Conversely, anti-SP7



177 staining reveals a subset of SP7-expressing cells are also Lgr6-GFP positive, supporting the data  
178 that Lgr6 is a marker of osteoprogenitors (Figure 3b-b’). To determine if these Lgr6-expressing  
179 cells give rise to additional cells in the bone during homeostasis, we performed a genetic lineage  
180 analysis using the Lgr6 tamoxifen inducible cre allele (Lgr6-EGFPcreERT) bred to a tdTomato  
181 cre reporter allele (Ai9)<sup>12,28</sup>. 2-month-old compound heterozygous mice were tamoxifen induced  
182 to genetically mark Lgr6-expressing cells with tdTomato. Five days post-tamoxifen, Lgr6-  
183 expressing cell descendants are present on the surface of the femoral trabeculae of bone. (Figure  
184 3c). 17 days post-tamoxifen, Lgr6-expressing cell descendants can occasionally be found in the  
185 adjacent cortical bone (Figure 3d). Taken together, these expression and lineage studies support  
186 Lgr6-expressing cells in the bone marrow as osteoprogenitors that contribute to bone  
187 homeostasis.

188 We next sought to determine whether Lgr6 is necessary for bone homeostasis. We  
189 analyzed 8-week-old male and female femurs from Lgr6-KO and Lgr6-WT mice by micro  
190 computed tomography ( $\mu$ CT) (Figure 4). Analysis of the bone parameters revealed that the distal  
191 femurs of Lgr6-KO mice had decreased trabecular bone volume as compared to Lgr6-WT mice  
192 (BV/TV, male=22%, p=0.013; female=22%, p=0.046) (Figure 4b). Analysis of additional  
193 trabecular parameters reveal a 7% decrease in trabecular thickness in female Lgr6-KO mice  
194 (Tb.Th, p=0.037), as well as a 14% increase in trabecular separation (Tb.Sp, p=0.019) and a 13%  
195 decrease in trabecular number (Tb.N, p=0.006) in male Lgr6-KO mice (Figure 4c-e).  $\mu$ CT  
196 analysis of the mid-cortical segment of Lgr6-KO and Lgr6-WT femurs did not find any  
197 significant differences (Supplemental Figure 7).

198 To further explore the function of Lgr6 in osteogenesis, we used ex vivo bone marrow  
199 culture from Lgr6-KO and Lgr6-WT mice and induced osteogenesis. 11 days post-

200 osteoinduction, Lgr6-KO cells showed significantly reduced ALP activity (male=30%,  
201  $p=0.0001$ ; female=22%,  $p=0.0001$ ) (Figure 4f). 18-21 days post-osteinduction, Lgr6-KO cells  
202 had reduced mineralization as compared to Lgr6-WT cells of the same sex (male=32%,  
203  $p=5.203E-06$ ; female=37%,  $p=0.0001$ ) (Figure 4g). Taken together, these data suggest that the  
204 Lgr6-KO trabecular bone phenotype is due to the reduced differentiation capability of Lgr6-  
205 expressing progenitor cells towards osteoblasts.

206

### 207 **RSPO2 and MaR1 differentially regulate LGR6 receptor signaling in osteoblasts**

208 Having defined a role for Lgr6 in osteoblast differentiation and bone homeostasis, we  
209 next addressed LGR6 receptor signaling in osteoprogenitors. LGR6 has two defined ligands, R-  
210 spondins (RSPO1-4) which when bound agonize WNT signaling, and maresin-1 (MaR1) which  
211 potentiates GPCR signaling as has been described in phagocytes<sup>19,20</sup>; these ligand-receptor-  
212 signaling interactions have not yet been defined in osteogenic cells. Of the four R-spondins,  
213 RSPO2 binds to LGR6 with the highest affinity in vitro and has an established role in  
214 osteoblastogenesis and bone development, thus RSPO2 is the R-spondin ligand we focused on in  
215 our experiments<sup>22,23</sup>. We first assessed WNT/ $\beta$ -catenin signaling using the TOPFlash luciferase  
216 assay. Using C3H10T1/2 cells with their endogenous level of Lgr6, MaR1 did not significantly  
217 stimulate WNT signaling, but RSPO2 did, as is found in other cell types<sup>19,29</sup> (102% increase,  
218  $p=0.005$ ) (Figure 5a). These findings were corroborated in the context of Lgr6 overexpression.  
219 Overexpression of Lgr6 in C3H10T1/2 cells resulted in increased WNT signaling (pBKS vs.  
220 pLgr6, 46%,  $p=9.8E-4$ ), which was further agonized by RSPO2 (pLgr6 vs. pLgr6/RSPO2, 34%,  
221  $p=7.0E-4$ ) (Figure 5b). While no significant difference was found between pLgr6 plus RSPO2  
222 versus the RSPO2 control (pBKS/RSPO2 vs. pLgr6/RSPO2,  $p=0.0515$ ), this experiment was

223 confounded by endogenous expression of Lgr6 in C3H10T1/2 cells, as well as the expression of  
224 Lgr4 which also agonizes WNT signaling upon RSPO binding in vitro<sup>30,31</sup>. Intriguingly,  
225 overexpression of Lgr6 in the presence of MaR1 inhibits pLgr6-induced WNT signaling (pLgr6  
226 vs. pLgr6/MaR1,  $p=3.8E-4$ ) suggesting reciprocal roles for MaR1 and RSPO2 in LGR6 mediated  
227 WNT signaling (Figure 5b).

228 We next evaluated the ability of RSPO2 and MaR1 to stimulate G-protein signaling by  
229 assaying cAMP activity in C3H10T1/2 cells. While no concentration of RSPO2 induced cAMP  
230 activity above the level of the vehicle control, MaR1 treatment led to an increase in cAMP  
231 activity at all concentrations tested greater than or equal to 50 ng/ml (50 ng/ml:  $p=1.2E-5$ , 100  
232 ng/ml:  $p=2.5E-5$ , 200 ng/ml:  $p=0.01$ , 400 ng/ml:  $p=0.035$ ) (Figure 5c). To determine whether  
233 MaR1-induced cAMP activity is Lgr6 specific, we evaluated this signaling in the context of Lgr6  
234 knockdown and overexpression. Consistent with the dose curve data, treatment of cells with 100  
235 ng/ml MaR1 in the context of control or Lgr6 overexpression resulted in increased cAMP  
236 activity (pCAG/vehicle vs. pCAG/MaR1,  $p=0.0046$ ; pCAG/vehicle vs. pLgr6/MaR1,  $p=.0022$ ).  
237 While no significant difference in cAMP activity was found between MaR1-treated pCAG and  
238 pLgr6 expressing cells, there is an increase in signaling in Lgr6 expressing cells between vehicle  
239 and MaR1 treatment (pLgr6/vehicle vs. pLgr6/MaR1,  $p=0.011$ ), suggesting Lgr6 dependency  
240 (Figure 5d). In complementary experiments, siRNA-mediated knockdown of Lgr6 in the  
241 presence of MaR1 results in a 55% reduction in cAMP activity as compared to MaR1 treated  
242 control siRNA cells ( $p=3.1E-4$ ) (Figure 5e). These results demonstrate that MaR1-induced  
243 cAMP activity in C3H10T1/2 cells is, at least in part, specific to Lgr6.

244 To determine whether exogenous RSPO2 and MaR1 influence osteogenesis, we  
245 performed proliferation and osteodifferentiation assays with C3H10T1/2 cells. Analysis of

246 proliferation by WST-1 assay determined that both MaR1- and RSPO2-treated cells had  
247 increased proliferation (18%,  $p=0.0008$  and 33%,  $p=0.02$ , respectively) (Figure 5f). Following  
248 induction of osteodifferentiation, RSPO2-treated cells had increased ALP activity 7 days post-  
249 induction (17%,  $p=0.006$ ) and increased mineralization 21 days post-induction (7%,  $p=0.0002$ )  
250 as compared to vehicle controls (Figure 5g-h). Interestingly, while MaR1 treatment did increase  
251 proliferation, it did not influence osteodifferentiation (Figure 5g-i), suggesting MaR1 and  
252 RSPO2 differentially regulate Lgr6 during osteogenesis.

253

## 254 **DISCUSSION**

255 Lgr6 is a marker of osteoprogenitor cells and is dynamically expressed during  
256 osteoblastogenesis such that it is highly expressed (Lgr6<sup>high</sup>) as cells are proliferating and more  
257 lowly expressed (Lgr6<sup>low</sup>) as cells differentiate<sup>14,16,17</sup>. In our present study, we used in vitro loss  
258 of function experiments in mouse primary cells (MSCs and MCOs) and demonstrated that loss of  
259 Lgr6 results in decreased proliferation, differentiation, and mineralization, which we also found  
260 with Lgr6-KO MSCs. In complementary experiments we found that overexpression of Lgr6  
261 leads to increased proliferation, differentiation, and mineralization of osteoprogenitors. While  
262 these data clearly demonstrate a role for Lgr6 in osteoblastogenesis, it raises the question as to  
263 when LGR6 exerts its function during the process. Does Lgr6 regulate osteoprogenitor  
264 proliferation when its expression is high (Lgr6<sup>high</sup>) with an indirect effect on osteodifferentiation  
265 or does Lgr6 directly regulate both processes during osteoblastogenesis (ie. Lgr6<sup>high</sup> regulates  
266 proliferation, Lgr6<sup>low</sup> regulates differentiation)? Our signaling data support the latter model. We  
267 have demonstrated for the first time in osteoprogenitors, that RSPO2/LGR6 enhances WNT  
268 signaling and MaR1/LGR6 stimulates cAMP activity, indicating that LGR6 can mediate two

269 different signaling pathways in a single cell type. Moreover, we find that RSPO2 increases  
270 osteoprogenitor proliferation and differentiation, whereas MaR1 only significantly increases  
271 proliferation, not differentiation, further supporting our model. Within the framework of this two  
272 ligands/one receptor model, it remains to be determined how in a single cell type, RSPO2 and  
273 MaR1 regulate two different pathways via LGR6 receptor binding. The finding that MaR1  
274 inhibits Lgr6 induced WNT signaling (Figure 5b, Vehicle/pLgr6 vs. MaR1/pLgr6) suggests  
275 competitive ligand binding, which has yet to be explored. However, the true signaling model  
276 could be more complex. Our data reveal modest RSPO2-induced WNT signaling and MaR1-  
277 induced cAMP activity even without over-expression of Lgr6 (Figures 5b and 5d, respectively).  
278 This finding may simply be due to endogenous background expression of LGR6 in C3H10T1/2  
279 cells, or it could reflect LGR6-dependent and -independent roles for both ligands. It is well-  
280 established that RSPO1, RSPO2, RSPO3, and RSPO4 are all capable of binding receptors LGR4,  
281 LGR5, and LGR6 to agonize WNT signaling<sup>19,30</sup>. Because LGR4 is also expressed in  
282 osteoprogenitors<sup>14,32</sup>, RSPO2 (and potentially the other R-spondins) may redundantly agonize  
283 WNT signaling through LGR4. The G-protein signaling role for MaR1 beyond its interactions  
284 with LGR6 is less clear. Orphan G-protein coupled receptor screening with MaR1 identified  
285 specific signaling with LGR6, not LGR4 or LGR5<sup>33</sup>, indicating that any LGR6-independent  
286 MaR1 induced cAMP activity (Figure 5d, MaR1/pCAG and Figure 5e, MaR1/siCon) would  
287 likely be indirect or utilizing an as-of-yet unidentified receptor.

288         Importantly, our in vitro Lgr6 data are supported by our in vivo mouse experiments. By  
289 histology we demonstrate that Lgr6-expressing cells sparsely populate the femoral trabecular  
290 bone marrow and genetic lineage analyses reveal that Lgr6-expressing cell descendants  
291 contribute to the cells of the trabecular surface and express SP7, supporting that Lgr6-expressing

292 cells are osteoblastic. Consistent with these findings, genetic loss-of-function experiments reveal  
293 significantly reduced BV/TV and trabecular thickness and increased trabecular separation in  
294 Lgr6-KO mice compared to Lgr6-WT controls. It remains to be determined whether increased  
295 LGR6 activity in MSCs in vivo would result in increased bone production like we find in vitro  
296 (Figure 2 and Supplemental Figure 6), which could provide inroads to novel anabolic therapies.  
297 While the result of exogenous RSPO2 treatment on bone has not been reported, exogenous  
298 MaR1 has been associated with bone regeneration<sup>24,34</sup>. Exogenous MaR1 can stimulate bone  
299 formation in rat molar sockets and resolve macrophage based inflammation resulting in  
300 improved fracture healing in aged mice, though these studies did not explore LGR6  
301 signaling<sup>24,34</sup>. Moving forward it will be important to determine if RSPO2 and/or MaR1 treated  
302 mice have increased bone mass, and whether this is an Lgr6-specific phenotype. Furthermore,  
303 our focus on the role of Lgr6 in bone originated in our finding that Lgr6 is expressed in the  
304 mouse digit tip bone and is necessary for digit tip bone regeneration following amputation<sup>13</sup>.  
305 While this present study focuses on a broader role for Lgr6 in bone homeostasis, our prior digit  
306 tip studies as well as the MaR1 bone regeneration studies suggest that Lgr6 also has an important  
307 role in bone fracture repair which would be an important focus of future studies<sup>13,24,34</sup>.

308

## 309 **MATERIALS AND METHODS**

### 310 **Mice**

311 All mouse breeding and experimentation was done with the approval of the Brigham and  
312 Women's Hospital IACUC. Primary MSCs and MCOs were derived from wildtype C57BL/6  
313 mice (JAX #000664; The Jackson Laboratory (JAX), Bar Harbor, ME, USA) from a specific  
314 pathogen free in-house breeding colony. Lgr6 expression studies used 8-week-old female Lgr6-

315 EGFPcreERT2 mice (JAX #016934). *Lgr6* genetic lineage analyses used the *Lgr6*-  
316 EGFPcreERT2 inducible cre allele and the R26R-CAG-LSL-tdTomato (Ai9; JAX #007909) cre  
317 reporter allele<sup>12,28</sup>. 8-week-old compound heterozygous *Lgr6*-EGFPcreERT2;R26R-CAG-LSL-  
318 tdTomato heterozygous mice were given three consecutive daily doses of 3mg/40g body weight  
319 tamoxifen in corn oil by oral gavage. Mice were euthanized and bones were collected for  
320 immunohistochemistry on day 5 or day 17 post-tamoxifen induction.

321 The *Lgr6* knockout allele (*Lgr6*-KO) was generated secondary to our efforts to engineer a  
322 conditional floxed allele. Using the dual guide CRISPR-Cas9 genome modification strategy<sup>35-37</sup>,  
323 sgRNAs were designed to *Lgr6* intron 14 and intron 16 on mouse chromosome 1 (Supplemental  
324 Figure 3, Supplemental Table 1); deletion of exons 15 and 16 results in frameshift and a  
325 nonsense transcript. Editing efficiency was validated in NIH3T3 cells, then crRNAs were  
326 commercially synthesized, as were two loxP-containing targeting oligonucleotides (IDT,  
327 Coralville, IA, USA). Guide sequences were *Lgr6*\_16.2 AltR1-  
328 ACAGAUCAUACAUUUCUCAGGUUUUAGAGCUAUGCU-AltR2 and *Lgr6*\_14.3 AltR1-  
329 GGCCAAGACCGGGAGCCUUGGUUUUAGAGCUAUGCU-AltR2; tracrRNA was ready  
330 made from IDT. The Harvard Genome Modification Facility generated RNPs with the  
331 crRNA:tracrRNA guides and Cas9 nuclease (IDT) and microinjected them with the targeting  
332 oligonucleotides into fertilized C57BL/6J mouse eggs. (Oligos were included in the injection in  
333 attempts to generate a floxed allele; the null allele described here does not have integration of  
334 these oligos.) Genomic DNA from all progeny was screened by PCR amplicon sequencing for  
335 integration of loxP sequences, and by long range PCR product cloning and sequencing to capture  
336 any locus deletions. For our new knockout allele (*Lgr6*-KO), a single founder from the above  
337 *Lgr6* CRISPR-Cas9 microinjection was found to have a deletion of exons 15 and 16 (without

338 introduction of loxP sequences). PCR amplicon DNA sequencing found no mutations in putative  
339 exonic off-target cut sites on mmChr1; genomic and qPCR analyses verify this to be a null allele  
340 (Supplemental Figure 3). The founder mouse was bred one generation onto FVB/NJ wildtype  
341 background, then crossed back into the C57BL/6 wildtype background for four generations. The  
342 Lgr6-KO mice are homozygous viable and fertile, with no overt phenotypes, as is found for the  
343 published Lgr6-null allele<sup>12</sup>.

#### 344 **Cell culture**

345 8-week-old female wildtype mice were used for isolation of primary MSCs by standard  
346 protocols<sup>38-40</sup>. In brief, femurs were dissected and cleaned of soft tissue in PBS. Femoral ends  
347 were removed, and bone marrow cells were flushed out with a 22G needle syringe and collected  
348 and plated for tissue culture in  $\alpha$ -MEM supplemented with 10% FBS, 2mM L-glutamine, and 1%  
349 penicillin/streptomycin. Adherent cells were grown to confluency and were repeatedly trypsinized  
350 and passaged eight times. The resultant cells were used as MSCs in experiments as described.  
351 For ex vivo bone marrow osteoblast culture, bone marrow was isolated from 8-week-old female  
352 Lgr6-WT or Lgr6-KO mice as described above and used directly in osteodifferentiation assays  
353 without generation of adherent MSCs.

354 Primary mouse calvarial osteoblast cells (MCOs) were isolated by standard  
355 protocols<sup>14,39,40</sup>. Postnatal day one wildtype mouse pups were euthanized, calvaria were dissected  
356 from skulls, cleaned of soft tissue, cut into small pieces, and subjected to five sequential  
357 dispase/collagenase digestions. Cells liberated in the second to fifth digestions were pooled and  
358 placed in FBS to neutralize the dissociation enzymes. Cells were concentrated and plated for  
359 tissue culture in proliferative media ( $\alpha$ -MEM supplemented with 10% FBS, 2mM L-glutamine,  
360 and 1% penicillin/streptomycin) and used as MCOs in experiments as described.



361 C3H10T1/2 cells (ATCC CCL-226, American Type Culture Collection, Manassas, VA,  
362 USA), immortalized mouse MSCs, were obtained from the Bone Cell Core at the MGH Center  
363 for Skeletal Research. C3H10T1/2 cells were in maintained in proliferative tissue culture  
364 medium ( $\alpha$ -MEM supplemented with 10% FBS, 2mM L-glutamine, and 1%  
365 penicillin/streptomycin) and used for experiments as described.

#### 366 **In vitro siRNA-mediated knockdown**

367 The TriFECTa DsiRNA system (IDT) was used for siRNA experiments; predesigned siRNAs  
368 were used for Lgr6 (siLgr6: mm.Ri.Lgr6.13) and negative control (siCon: DS NC1). For Lgr6  
369 knockdown experiments,  $1 \times 10^4$  primary MCOs or MSCs were seeded in 24-well plates and  
370 cultured for 24 hours in proliferative media. At 40-50% confluency, cells were transfected with  
371 siLgr6 or siCon siRNAs (100nM or as noted) using the Lipofectamine RNAiMAX transfection  
372 reagent (Thermo Fisher, Waltham, MA, USA) according to the manufacturer's protocol.  
373 Subsequent cell culturing and treatment is as noted for individual assays. Lgr6 protein levels  
374 were analyzed by standard western blot analysis using anti-LGR6 (ab126747, 1:1000; Abcam,  
375 Cambridge, MA, USA) and anti-GAPDH (ADI-CSA-335-E, 1:5000; Enzo Life Sciences,  
376 Farmingdale, NY, USA) antibodies. All knockdown experiments were performed in technical  
377 duplicate and biological triplicate.

#### 378 **in vitro cDNA overexpression**

379 The Lgr6 overexpression plasmid (pCAG-Lgr6) was constructed by replacing the GFP cassette  
380 in the control vector (pCAG-GFP; plasmid #11150, Addgene, Cambridge, MA, USA) with the  
381 mouse Lgr6 coding sequence. Bases 137 to 3040 from NCBI genbank accession  
382 NM\_001033409.3 was amplified from mouse MSC-derived cDNA, PCR purified, and cloned  
383 into the NotI linearized pCAG backbone using Gibson assembly (NEB, Ipswich, MA, USA).

384 The resultant plasmid was DNA sequenced and no mutations were found. For overexpression  
385 experiments,  $1 \times 10^4$  MCOs, MSCs, or C3H10T1/2 cells were plated in 24-well plate and cultured  
386 for 24h in proliferative media. At 40-50% confluency, cells were transfected pCAG-Lgr6 or  
387 control plasmid (100 ng/ml or as noted) using the Fugene HD transfection reagent (Promega,  
388 Madison, WI, USA). Subsequent cell culturing and treatment is as noted for individual assays.  
389 All overexpression experiments were performed in technical duplicate and biological triplicate.

### 390 **Quantitative PCR**

391 Following MSC or MCO Lgr6 knockdown or over-expression experiments, cells to be analyzed  
392 by qPCR were collected and total RNA was extracted using the Qiagen RNeasy Plus Micro kit  
393 (Qiagen, Germantown, MD, USA). First strand cDNA was synthesized using SuperScript IV  
394 reverse transcriptase with oligo dT primers (Thermo Fisher). Purified cDNA from experimental  
395 samples was used as input for qPCR. Using the QuantStudio 5 Real-Time PCR 384-well system  
396 (Applied Biosystems, Foster City, CA, USA), osteogenic (Sp7, Runx2, ALP, and OPN) and  
397 control (HPRT) transcripts were amplified (Supplemental Table 1) using SsoAdvanced Universal  
398 SYBR Green Supermix (Biorad, Hercules, CA, USA). Established TaqMan assays were used to  
399 determine the expression of Lgr6 and TBP intra-well controls. Delta threshold cycle ( $\Delta C_t$ ) was  
400 calculated for each well using the  $2^{-\Delta C_t}$  method<sup>41</sup>. All qPCR experiments were performed in both  
401 technical and biological triplicate.

### 402 **Cell proliferation assay**

403 The WST-1 reagent (Sigma-Aldrich, St. Louis, MO, USA) was used for all experiments  
404 assessing cellular proliferation. MCOs, MSCs, or C3H10T1/2 transfected cells (as detailed  
405 above), or Lgr6-KO and control cells were cultured for 24 hours in proliferative media. 10uL of  
406 WST-1 reagent was added to the wells four hours prior to harvest. Following the incubation, all

407 wells were analyzed on a colorimetric plate reader at 450nm (BioRad). All proliferation assays  
408 were performed in technical duplicate and biological triplicate.

#### 409 **In vitro differentiation assays**

410 For osteodifferentiation assays, cells growing in proliferative media were changed into  
411 osteogenic media which was changed every 48 hours. For C3H10T1/2 cells and primary MSCs,  
412 osteogenic media composition was  $\alpha$ -MEM supplemented with 10% FBS, 2mM L-glutamine,  
413 10mM  $\beta$ -glycerophosphate, 50  $\mu$ g/mL ascorbic acid, 100nM dexamethasone, and 1%  
414 penicillin/streptomycin; for primary MCOs, osteogenic media composition was  $\alpha$ -MEM  
415 supplemented with 10% FBS, 2mM L-glutamine, 10mM  $\beta$ -glycerophosphate, 50  $\mu$ g/mL ascorbic  
416 acid and 1% penicillin/streptomycin<sup>14,38-40</sup>. Length of osteodifferentiation and choice of terminal  
417 assay varied by experiment as detailed throughout. For experiments assaying alkaline  
418 phosphatase (ALP) activity, cells were in PBS, then subjected to a  $-80^{\circ}\text{C}/37^{\circ}\text{C}$  freeze-thaw  
419 cycle. Para-nitrophenylphosphate (PNPP) substrate was used to measure ALP activity by  
420 colorimetric quantification at 405nm. For experiments assaying alizarin red-S staining, cells  
421 were harvested 18-21 days post-osteoinduction. Cells were fixed in 4% paraformaldehyde and  
422 stained with 40mM Alizarin red-S. For quantification, cells were incubated in 10% acetic acid  
423 and collected by scraping. Samples were incubated at  $90^{\circ}\text{C}$  for 5 min followed by centrifugation;  
424 resultant supernatant was mixed with 10% ammonium hydroxide and used for colorimetric  
425 quantification at 405 nm<sup>42</sup>. For adipogenic differentiation, cells are incubated for 12 days in  
426 adipogenic induction medium containing 100nM dexamethasone, 0.5 $\mu$ M isobutylmethylxanthine  
427 (IBMX) and 10ng/ml insulin, with media changes every 48 hours. Oil Red O was used to stain  
428 adipocytes and was quantified at 510nm following isopropanol dye extraction<sup>43</sup>. For  
429 chondrogenic differentiation, cells were cultured for 12 days in high-glucose DMEM

430 supplemented with 100nM dexamethasone, 1% insulin-transferrin-sodium selenite (ITS), 50 $\mu$ M  
431 ascorbate-2-phosphate, 1mM sodium pyruvate, 50 $\mu$ g/ml proline, and 20ng/ml TGF $\beta$ 3 for 12  
432 days. Alcian blue was used to stain chondrocytes and was quantified at 620nm following  
433 hydrochloric acid extraction<sup>44</sup>.

#### 434 **Immunohistochemistry**

435 Femurs from Lgr6-EGFPcreERT2 mice were collected in PBS, cleaned of soft tissue, and then  
436 fixed in 4% PFA overnight at 4°C. The bones were washed in PBS, taken through an increasing  
437 sucrose gradient (5-30%), then embedded and frozen in OCT freezing medium (Sakura Finetek,  
438 Torrance, CA, USA), and cut into 16-20 $\mu$ m cryosections. Sections were blocked in 5% goat  
439 serum then incubated with primary antibody at 4°C overnight (anti-dsRed for tdTomato (632496,  
440 1:1000; Takara Bio, Mountain View, CA, USA), anti-SP7 (ab22552, 1:2000; Abcam), anti-GFP  
441 (ab13970, 1:1000; Abcam)). Sections were washed with PBST and incubated with species-  
442 specific Cy3, or A647 fluorophore-conjugated secondary antibody (Jackson ImmunoResearch,  
443 West Grove, PA, USA) at room temperature for 1 hour. Slides were washed in PBST,  
444 counterstained with DAPI or TO-PRO-3 (Thermo Fisher), and coverslipped with Fluoromount-G  
445 mounting medium (Southern Biotech, Birmingham, AL, USA). TRAP staining was performed  
446 using the ELF-97 endogenous phosphatase detection kit (Thermo Scientific). A Zeiss LSM800  
447 confocal microscope was used for fluorescent imaging at the BWH Confocal Microscopy Core.

#### 448 **Micro computed tomography**

449 Femurs were isolated from 8-week-old Lgr6-WT and Lgr6-KO mice and stored in 70% ethanol  
450 prior to analysis. For microCT analysis, a Scanco Medical  $\mu$ CT 35 system with an isotropic  
451 voxel size of 7 $\mu$ m was used to image femurs. Scans were conducted in 70% ethanol using an X-  
452 ray tube potential of 55 kVp, an X-ray intensity of 0.145 mA and an integration time of 400 ms.

453 A region starting at a reference point anchored 0.35 mm proximal to the growth plate and  
454 extending 1.4 mm proximally was selected for distal femur trabecular bone analysis. A second  
455 region 0.56 mm in length located at the midshaft of the femur was used to calculate cortical  
456 parameters. A semi-automated contouring approach was used to distinguish cortical and  
457 trabecular bone. The region of interest was thresholded using a global threshold that set the  
458 bone/marrow cut-off at 453 mg HA/ccm for trabecular bone and 772 mg HA/ccm for cortical  
459 bone. 3-D microstructural properties of bone, including bone volume fraction (BV/TV),  
460 trabecular thickness (Tb.Th), trabecular number (Tb.N), trabecular separation (Tb.Sp) were  
461 calculated using software supplied by the manufacturer. Bone parameters are reported according  
462 to standard guidelines<sup>45</sup>.

#### 463 **WNT signaling luciferase reporter assay**

464  $1 \times 10^4$  MSCs or C3H10T1/2 cells were seeded in 24-well plates, grown to 40-50% confluency for  
465 transfection. All wells were transfected with the 100ng TOPFlash WNT signaling reporter plasmid<sup>46</sup>  
466 (M50 Super 8x TOPFlash was a gift from Randall Moon; Addgene plasmid #12456) and 20ng pRL-  
467 TK Renilla control plasmid construct (Promega) using Fugene HD transfection reagent. Cells were  
468 co-transfected with 100ng pCAG-Lgr6 overexpression plasmid (pLgr6) or pBluescript II KS+  
469 (pBKS) (Agilent Technologies, Santa Clara, CA, USA) as a control. RSPO2 (100ng/ml or as noted)  
470 (R&D Systems, Minneapolis, MN, USA), MaR1 (100ng/ml or as noted) (Cayman Chemical, Ann  
471 Arbor, MI, USA), or vehicle control (0.1% ethanol) was added to the media of the transfected cells.  
472 72 hours post-transfection, cells were harvested for luciferase and renilla quantification using the  
473 Dual-Luciferase Reporter Assay System (Promega). Luciferase activity divided by renilla activity  
474 was used to calculate TOPFlash activity. Experiments were performed technical duplicate and  
475 biological triplicate.

#### 476 **cAMP activity assay**

477  $1 \times 10^4$  MSCs or C3H10T1/2 cells were seeded in 24-well plates, grown to 40-50% confluency for  
478 transfection. In overexpression experiments, cells were transfected with 100ng pCAG-Lgr6 (pLgr6)  
479 or pCAG-GFP (pCAG) control; in knockdown experiments, cells were transfected with siLgr6 or  
480 siCon control. 24 hours post-transfection, samples cells were treated with RSPO2 (100ng/ml or as  
481 noted), MaR1 (100ng/ml or as noted), or vehicle control (0.1% ethanol) in cAMP induction media  
482 for 30 minutes. Following the treatment, cells were harvested for quantification of cAMP activity  
483 using the cAMP-GLO Assay Kit (Promega). Percent increase in cAMP activity was calculated by the  
484 difference between control and treated groups, divided by control, then converted into a percentage.  
485 Experiments were performed in technical duplicate and biological triplicate.

486

#### 487 **ACKNOWLEDGEMENTS**

488 We thank the Confocal Microscopy Core at BWH for providing Zeiss LSM800 confocal access  
489 and the Harvard Genome Modification Facility for mouse allele generation. Support for this  
490 research was provided by a grant from the MGH Center for Skeletal Research NIH/NIAMS  
491 P30AR075042 (JAL), an Innovator Award from The Gillian Reny Stepping Strong Center for  
492 Trauma Innovation (JAL), a Brigham Research Institute microgrant (VK), and funds from BWH  
493 Department of Orthopedic Surgery (JAL).

494

#### 495 **CONFLICT OF INTERESTS**

496 The authors have declared that no conflict of interest exists.

497

#### 498 **REFERENCES**

- 499 1. Sambrook, P. & Cooper, C. Osteoporosis. *Lancet (London, England)* **367**, 2010–8 (2006).  
500 2. Wright, N. C. *et al.* The recent prevalence of osteoporosis and low bone mass in the

- 501 United States based on bone mineral density at the femoral neck or lumbar spine. *J. Bone*  
502 *Miner. Res.* **29**, 2520–2526 (2014).
- 503 3. Office of the Surgeon General. 2. The Basics of Bone in Health and Disease. *Bone Heal.*  
504 *Osteoporos. A Rep. Surg. Gen.* (2004).
- 505 4. Chen, J. S. & Sambrook, P. N. Antiresorptive therapies for osteoporosis: a clinical  
506 overview. *Nat. Rev. Endocrinol.* **8**, 81–91 (2011).
- 507 5. Filleul, O., Crompton, E. & Saussez, S. Bisphosphonate-induced osteonecrosis of the jaw: a  
508 review of 2,400 patient cases. *J. Cancer Res. Clin. Oncol.* **136**, 1117–1124 (2010).
- 509 6. Zanchetta, M. B. *et al.* Significant bone loss after stopping long-term denosumab  
510 treatment: a post FREEDOM study. *Osteoporos. Int. a J. Establ. as result Coop. between*  
511 *Eur. Found. Osteoporos. Natl. Osteoporos. Found. USA* **29**, 41–47 (2018).
- 512 7. Khosla, S. Bone diseases: Romosozumab - on track or derailed? *Nat. Rev. Endocrinol.* **13**,  
513 697–698 (2017).
- 514 8. Nakatoh, S. Effect of osteoporosis medication on changes in bone mineral density and  
515 bone turnover markers after 24-month administration of daily teriparatide: comparison  
516 among minodronate, raloxifene, and eldecalcitol. *J. Bone Miner. Metab.* **36**, 221–228  
517 (2018).
- 518 9. Padhi, D., Jang, G., Stouch, B., Fang, L. & Posvar, E. Single-dose, placebo-controlled,  
519 randomized study of AMG 785, a sclerostin monoclonal antibody. *J. Bone Miner. Res.* **26**,  
520 19–26 (2011).
- 521 10. Cosman, F. *et al.* Romosozumab Treatment in Postmenopausal Women with  
522 Osteoporosis. *N. Engl. J. Med.* **375**, 1532–1543 (2016).
- 523 11. Brixen, K. T., Christensen, P. M., Ejersted, C. & Langdahl, B. L. Teriparatide

- 524 (biosynthetic human parathyroid hormone 1-34): a new paradigm in the treatment of  
525 osteoporosis. *Basic Clin. Pharmacol. Toxicol.* **94**, 260–270 (2004).
- 526 12. Snippet, H. J. *et al.* Lgr6 marks stem cells in the hair follicle that generate all cell  
527 lineages of the skin. *Science* **327**, 1385–1389 (2010).
- 528 13. Lehoczky, J. A. & Tabin, C. J. Lgr6 marks nail stem cells and is required for digit tip  
529 regeneration. *Proc. Natl. Acad. Sci. U. S. A.* **112**, 13249–13254 (2015).
- 530 14. Khedgikar, V. & Lehoczky, J. A. Evidence for Lgr6 as a Novel Marker of Osteoblastic  
531 Progenitors in Mice. *JBMR Plus* (2018) doi:10.1002/jbm4.10075.
- 532 15. Lee, J.-H. *et al.* Anatomically and Functionally Distinct Lung Mesenchymal Populations  
533 Marked by Lgr5 and Lgr6. *Cell* **170**, 1149–1163.e12 (2017).
- 534 16. Lee, Y. H., Sharma, A. R., Jagga, S., Lee, S. S. & Nam, J. S. Differential Expression  
535 Patterns of R-spondin Family and Leucine-Rich Repeat-Containing G-Protein Coupled  
536 Receptors in Chondrocytes and Osteoblasts. *Cell J.* **22**, 437–449 (2021).
- 537 17. Cui, Y., Huang, R., Wang, Y., Zhu, L. & Zhang, X. Down-regulation of LGR6 promotes  
538 bone fracture recovery using bone marrow stromal cells. *Biomed. Pharmacother.* **99**, 629–  
539 637 (2018).
- 540 18. Li, C. *et al.* Targeted next generation sequencing of nine osteoporosis-related genes in the  
541 Wnt signaling pathway among Chinese postmenopausal women. *Endocrine* (2020)  
542 doi:10.1007/s12020-020-02248-x.
- 543 19. Gong, X. *et al.* LGR6 is a high affinity receptor of R-spondins and potentially functions as  
544 a tumor suppressor. *PLoS One* **7**, e37137 (2012).
- 545 20. Chiang, N., Libreros, S., Norris, P. C., de la Rosa, X. & Serhan, C. N. Maresin 1 activates  
546 LGR6 receptor promoting phagocyte immunoresolvent functions. *J. Clin. Invest.* **129**,



- 547 5294–5311 (2019).
- 548 21. Liu, S.-L. *et al.* LGR6 promotes osteogenesis by activating the Wnt/beta-catenin signaling  
549 pathway. *Biochem. Biophys. Res. Commun.* **519**, 1–7 (2019).
- 550 22. Friedman, M. S., Oyserman, S. M. & Hankenson, K. D. Wnt11 promotes osteoblast  
551 maturation and mineralization through R-spondin 2. *J. Biol. Chem.* **284**, 14117–14125  
552 (2009).
- 553 23. Knight, M. N. *et al.* R-spondin-2 is a Wnt agonist that regulates osteoblast activity and  
554 bone mass. *Bone Res.* **6**, 24 (2018).
- 555 24. Wang, C. W. *et al.* Maresin 1 Promotes Wound Healing and Socket Bone Regeneration  
556 for Alveolar Ridge Preservation. *J. Dent. Res.* **99**, (2020).
- 557 25. Huang, R., Vi, L., Zong, X. & Baht, G. S. Maresin 1 resolves aged-associated macrophage  
558 inflammation to improve bone regeneration. *FASEB J. Off. Publ. Fed. Am. Soc. Exp.*  
559 *Biol.* (2020) doi:10.1096/fj.202001145R.
- 560 26. Baron, R. & Kneissel, M. WNT signaling in bone homeostasis and disease: from human  
561 mutations to treatments. *Nat. Med.* **19**, 179–192 (2013).
- 562 27. Luo, J., Sun, P., Siwko, S., Liu, M. & Xiao, J. The role of GPCRs in bone diseases and  
563 dysfunctions. *Bone Res.* **7**, 19 (2019).
- 564 28. Madisen, L. *et al.* A robust and high-throughput Cre reporting and characterization system  
565 for the whole mouse brain. *Nat Neurosci* **13**, 133–140 (2010).
- 566 29. Park, S. *et al.* Differential activities and mechanisms of the four R-spondins in  
567 potentiating Wnt/beta-catenin signaling. *J. Biol. Chem.* **293**, 9759–9769 (2018).
- 568 30. Carmon, K. S., Gong, X., Lin, Q., Thomas, A. & Liu, Q. R-spondins function as ligands of  
569 the orphan receptors LGR4 and LGR5 to regulate Wnt/beta-catenin signaling. *Proc. Natl.*

- 570 *Acad. Sci. U. S. A.* **108**, 11452–11457 (2011).
- 571 31. Khedgikar, V. & Lehoczky, J. A. Evidence for Lgr6 as a Novel Marker of Osteoblastic  
572 Progenitors in Mice. *JBMR Plus* **3**, e10075 (2019).
- 573 32. Luo, J. *et al.* LGR4 is a receptor for RANKL and negatively regulates osteoclast  
574 differentiation and bone resorption. *Nat. Med.* **22**, 539–46 (2016).
- 575 33. Chiang, N., Libreros, S., Norris, P. C., de la Rosa, X. & Serhan, C. N. Maresin 1 activates  
576 LGR6 receptor promoting phagocyte immunoresolvent functions. *J. Clin. Invest.* **129**,  
577 5294–5311 (2019).
- 578 34. Huang, R., Vi, L., Zong, X. & Baht, G. S. Maresin 1 resolves aged-associated macrophage  
579 inflammation to improve bone regeneration. *FASEB J. Off. Publ. Fed. Am. Soc. Exp.*  
580 *Biol.* **34**, (2020).
- 581 35. Jinek, M. *et al.* A programmable dual-RNA-guided DNA endonuclease in adaptive  
582 bacterial immunity. *Science* **337**, 816–821 (2012).
- 583 36. Cong, L. *et al.* Multiplex genome engineering using CRISPR/Cas systems. *Science* **339**,  
584 819–823 (2013).
- 585 37. Mali, P. *et al.* RNA-guided human genome engineering via Cas9. *Science* **339**, 823–826  
586 (2013).
- 587 38. Tropel, P. *et al.* Isolation and characterisation of mesenchymal stem cells from adult  
588 mouse bone marrow. *Exp. Cell Res.* (2004) doi:10.1016/j.yexcr.2003.12.030.
- 589 39. Huang, S. *et al.* An improved protocol for isolation and culture of mesenchymal stem cells  
590 from mouse bone marrow. *J. Orthop. Transl.* (2015) doi:10.1016/j.jot.2014.07.005.
- 591 40. Zhu, H. *et al.* A protocol for isolation and culture of mesenchymal stem cells from mouse  
592 compact bone. *Nat. Protoc.* (2010) doi:10.1038/nprot.2009.238.

- 593 41. Livak, K. J. & Schmittgen, T. D. Analysis of relative gene expression data using real-time  
594 quantitative PCR and the  $2^{-\Delta\Delta CT}$  method. *Methods* (2001) doi:10.1006/meth.2001.1262.
- 595 42. Gregory, C. A., Gunn, W. G., Peister, A. & Prockop, D. J. An Alizarin red-based assay of  
596 mineralization by adherent cells in culture: comparison with cetylpyridinium chloride  
597 extraction. *Anal. Biochem.* **329**, 77–84 (2004).
- 598 43. Ramírez-Zacarías, J. L., Castro-Muñozledo, F. & Kuri-Harcuch, W. Quantitation of  
599 adipose conversion and triglycerides by staining intracytoplasmic lipids with Oil red O.  
600 *Histochemistry* **97**, 493–497 (1992).
- 601 44. Bhat, A., Boyadjiev, S. A., Senders, C. W. & Leach, J. K. Differential growth factor  
602 adsorption to calvarial osteoblast-secreted extracellular matrices instructs osteoblastic  
603 behavior. *PLoS One* **6**, e25990 (2011).
- 604 45. Bouxsein, M. L. *et al.* Guidelines for assessment of bone microstructure in rodents using  
605 micro-computed tomography. *J. Bone Miner. Res.* **25**, 1468–1486 (2010).
- 606 46. Veeman, M. T., Slusarski, D. C., Kaykas, A., Louie, S. H. & Moon, R. T. Zebrafish  
607 prickle, a modulator of noncanonical Wnt/Fz signaling, regulates gastrulation movements.  
608 *Curr. Biol.* (2003) doi:10.1016/S0960-9822(03)00240-9.

609

## 610 **FIGURE LEGENDS**

### 611 **Figure 1**

612 Knockdown of Lgr6 results in reduced osteoblast proliferation, differentiation, and  
613 mineralization in MSC derived osteoblasts. (a) Cell proliferation quantified by WST-1 assay in  
614 Lgr6 knockdown (siLgr6) and control knockdown (siCon) MSCs. (b and c) qPCR-derived RNA  
615 expression of Runx2 and Sp7 in Lgr6 knockdown MSCs relative to controls following 24 and 72

616 hours of osteoinduction. (d) Alkaline phosphatase (ALP) activity in knockdown MSCs 1, 3, and  
617 7 days post-osteoinduction. (e) Quantification of alizarin red-S (ARS) staining of knockdown  
618 MSCs 18 days post-osteoinduction. Lgr6-KO and Lgr6-WT primary MSCs show reduced (f)  
619 proliferation by WST-1 assay, (g) ALP activity 12 days post-osteoinduction, and (h) ARS  
620 staining 21 days post-osteoinduction. Each experiment was performed in triplicate and analyzed  
621 by Student's t-test; \* $p < 0.05$ , \*\* $p < 0.01$ , \*\*\* $p < 0.001$ , ns = not significant. Error is reported as  
622 standard deviation.

623

## 624 **Figure 2**

625 Lgr6 overexpression promotes MSC proliferation and osteodifferentiation. (a) Cell proliferation  
626 quantified by WST-1 assay in Lgr6 overexpression (pLgr6) and control (pCAG) MSCs. (b)  
627 qPCR-derived RNA expression of Runx2, Sp7, Alkaline phosphatase (ALP), and Osteopontin  
628 (OPN) in Lgr6 overexpression MSCs relative to controls following 7 days of osteoinduction. (c)  
629 ALP activity in Lgr6 overexpression MSCs 1, 3, and 7 days post-osteoinduction. (d)  
630 Quantification of ARS staining of Lgr6 overexpression MSCs 18 days post-osteoinduction. Each  
631 experiment was performed in triplicate and analyzed by Student's t-test; \* $p < 0.05$ , \*\* $p < 0.01$ .  
632 Error is reported as standard deviation.

633

## 634 **Figure 3**

635 Immunohistochemistry and genetic lineage analysis of Lgr6-expressing osteoprogenitors. (a and  
636 b) Immunohistochemistry of adult Lgr6-EGFPcreERT2 mouse femur with sections of trabecular  
637 bone from femoral head. (a-a'') Few Lgr6 expressing cells (green; marked by arrowheads) are  
638 found within the bone marrow and do not co-label with TRAP stained osteoclasts (blue). Nuclei

639 are stained with To-Pro-3 (red). (b-b'') Lgr6-expressing cells (green; marked by arrowheads), co-  
640 label with subset of Sp7 expressing osteoblasts (red) found at the periphery of the trabeculae.  
641 Nuclei are stained with DAPI (blue). (c and d) Immunohistochemistry of adult tamoxifen  
642 induced Lgr6-EGFPcreERT2;R26R-CAG-LSL-TdTomato mouse femur with section through (c)  
643 femoral head trabeculae and (d) cortical bone; nuclei are marked with DAPI (blue). (c) Lgr6-  
644 expressing cell descendants (red) are found surrounding the trabeculae 5 days post-tamoxifen  
645 induction, and (d) on the endosteal surface of the adjacent cortical bone 17 days post-tamoxifen  
646 induction. Scale bars are 10 $\mu$ m.

647

#### 648 **Figure 4**

649 Lgr6 knockout mice have decreased trabecular bone parameters compared to controls. MicroCT  
650 analysis of femurs from 8-week-old Lgr6 wildtype (WT) and Lgr6-knockout (KO) male and  
651 female mice. (a) Representative 3D images of trabeculae from each sex and genotype. (b-e)  
652 Trabeculae bone parameter with significant differences between genotypes: (b) bone  
653 volume/tissue volume (BV/TV), (c) trabecular thickness (Tb.Th), (d) trabecular separation  
654 (Tb.Sp), and (e) trabecular number (Tb.N). Cohort sizes: 14 female Lgr6-WT mice, 11 female  
655 Lgr6-KO mice, 11 male Lgr6-WT mice, and 12 male Lgr6-KO mice. Quantitative bone  
656 parameters were analyzed for significance by Student's t-test; sexes were analyzed separately. (f  
657 and g) Osteodifferentiation of primary bone marrow cells from Lgr6-WT and Lgr6-KO  
658 littermates. (f) Measurement of ALP activity 12 days of post-osteoiduction. (g) Quantification  
659 of alizarin red-S (ARS) staining 21 days post-osteoiduction. Each bone marrow cell  
660 osteodifferentiation experiment was performed in triplicate and analyzed by Student's t-test;  
661 \* $p < 0.05$ , \*\* $p < 0.01$ , \*\*\* $p < 0.001$ , ns = not significant. Error is reported as standard deviation.

662

663 **Figure 5**

664 Lgr6 mediated WNT/ $\beta$ -catenin and GPCR/cAMP signaling in response to RSPO2 or MaR1 in  
665 C3H10T1/2 cells. (a and b) TOPFlash luciferase assay to assess WNT/ $\beta$ -catenin signaling. (a)  
666 WNT signaling in the presence of 100ng/ml MaR1 or 100ng/ml RSPO2 as compared to vehicle  
667 control. (b) WNT signaling in the context of Lgr6 overexpression (pLgr6) or control (pBKS)  
668 when exposed to 100ng/ml MaR1, 100ng/ml RSPO2, or vehicle control. (c-e) cAMP activity  
669 assay to assess GPCR/cAMP signaling. (d) cAMP activity at over a range of MaR1 and RSPO2  
670 concentrations (0-400ng/ml). (d) cAMP activity in the context of Lgr6 overexpression (pLgr6) or  
671 control (pCAG) when exposed to 100ng/ml MaR1 or vehicle control. (e) cAMP activity in the  
672 context of Lgr6 knockdown (siLgr6) or control (siCon) when exposed to 100ng/ml MaR1 or  
673 vehicle control. All signaling experiments were performed in technical duplicate and biological  
674 triplicate, and analyzed by one-way ANOVA test with Tukey's HSD posthoc analysis. (f-h)  
675 Proliferation and osteodifferentiation assays using in the presence of 100ng/mL MaR1, 100ng/ml  
676 RSPO2, or vehicle control. (f) Cell proliferation measured by WST-1 assay, (g) ALP activity 3  
677 days post-osteinduction, and (h) ARS staining 21 days post-osteinduction. Each experiment  
678 was performed in triplicate and analyzed by Student's t-test, \* $p < 0.05$ , \*\* $p < 0.01$ , \*\*\* $p < 0.001$ .  
679 Error is reported as standard deviation.

680

681 **FIGURES**

682

683 **Figure 1**

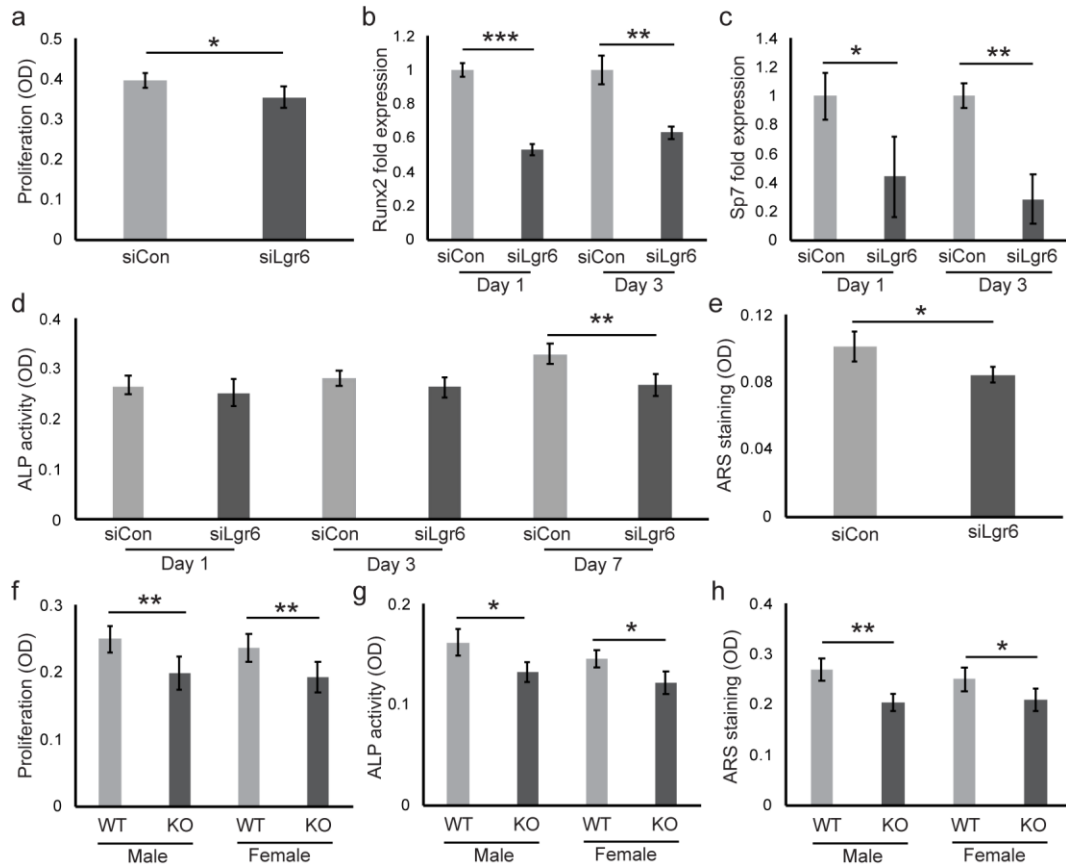

684

685

686

687 **Figure 2**

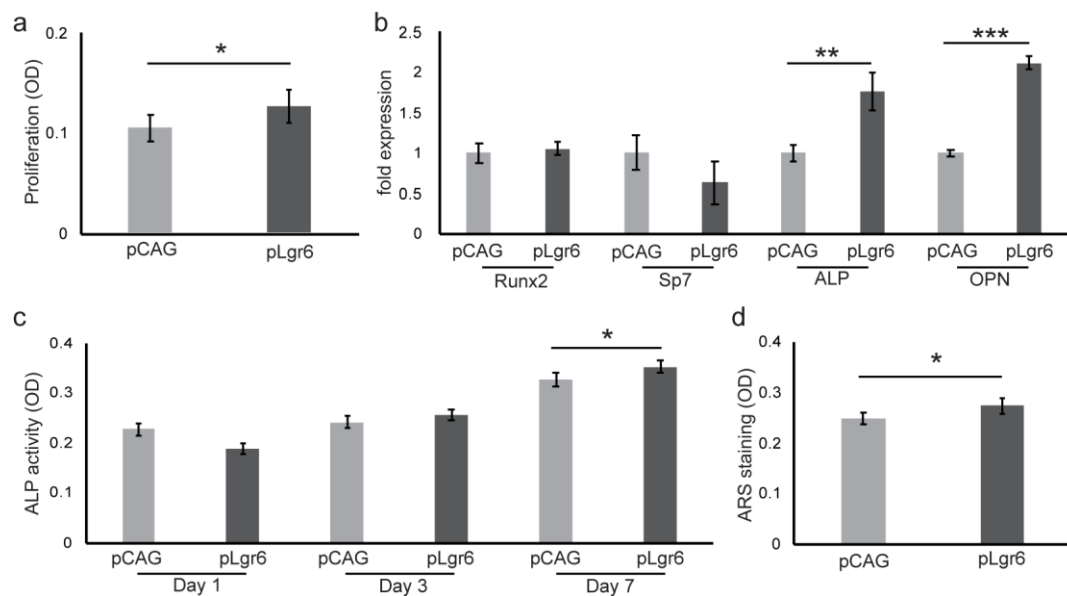

688

689

690



691 **Figure 3**

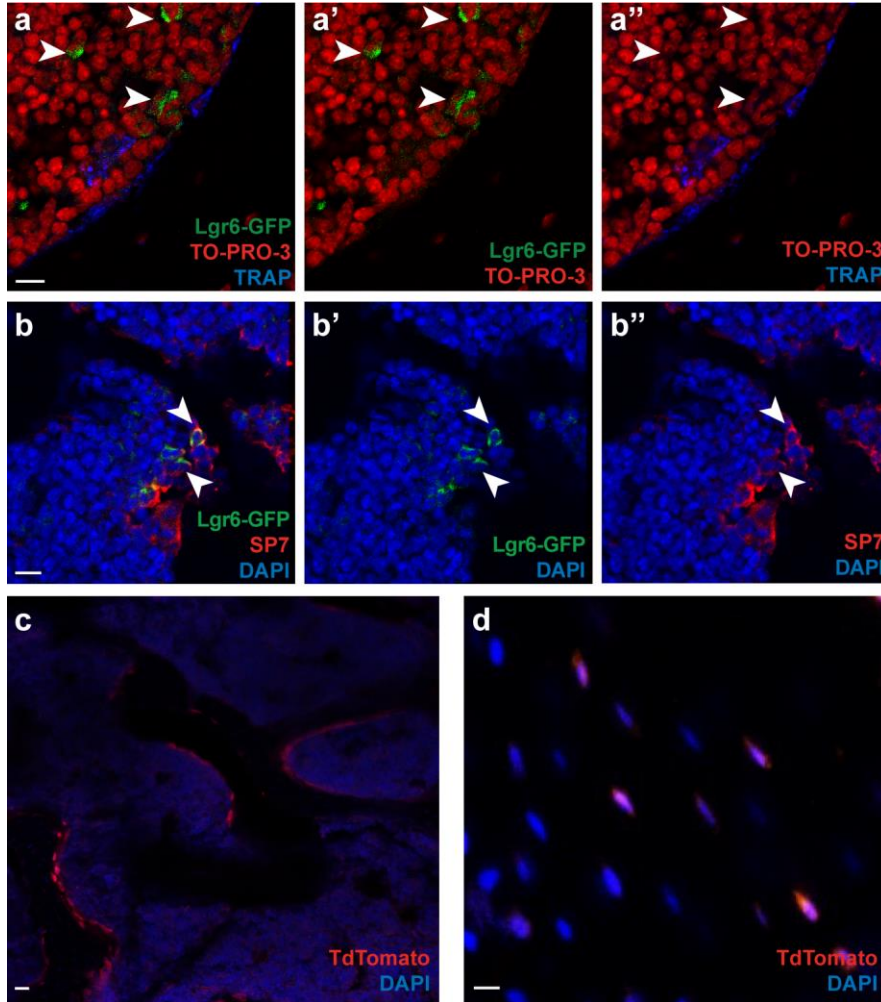

692

693

694

695 **Figure 4**

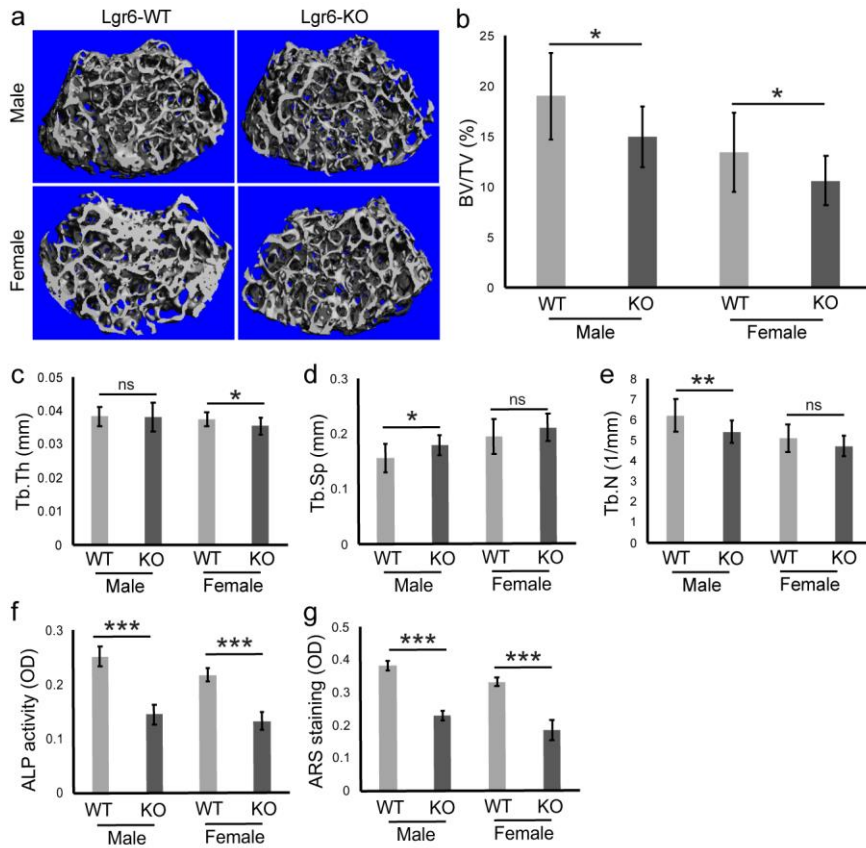

696

697

698

699 **Figure 5**

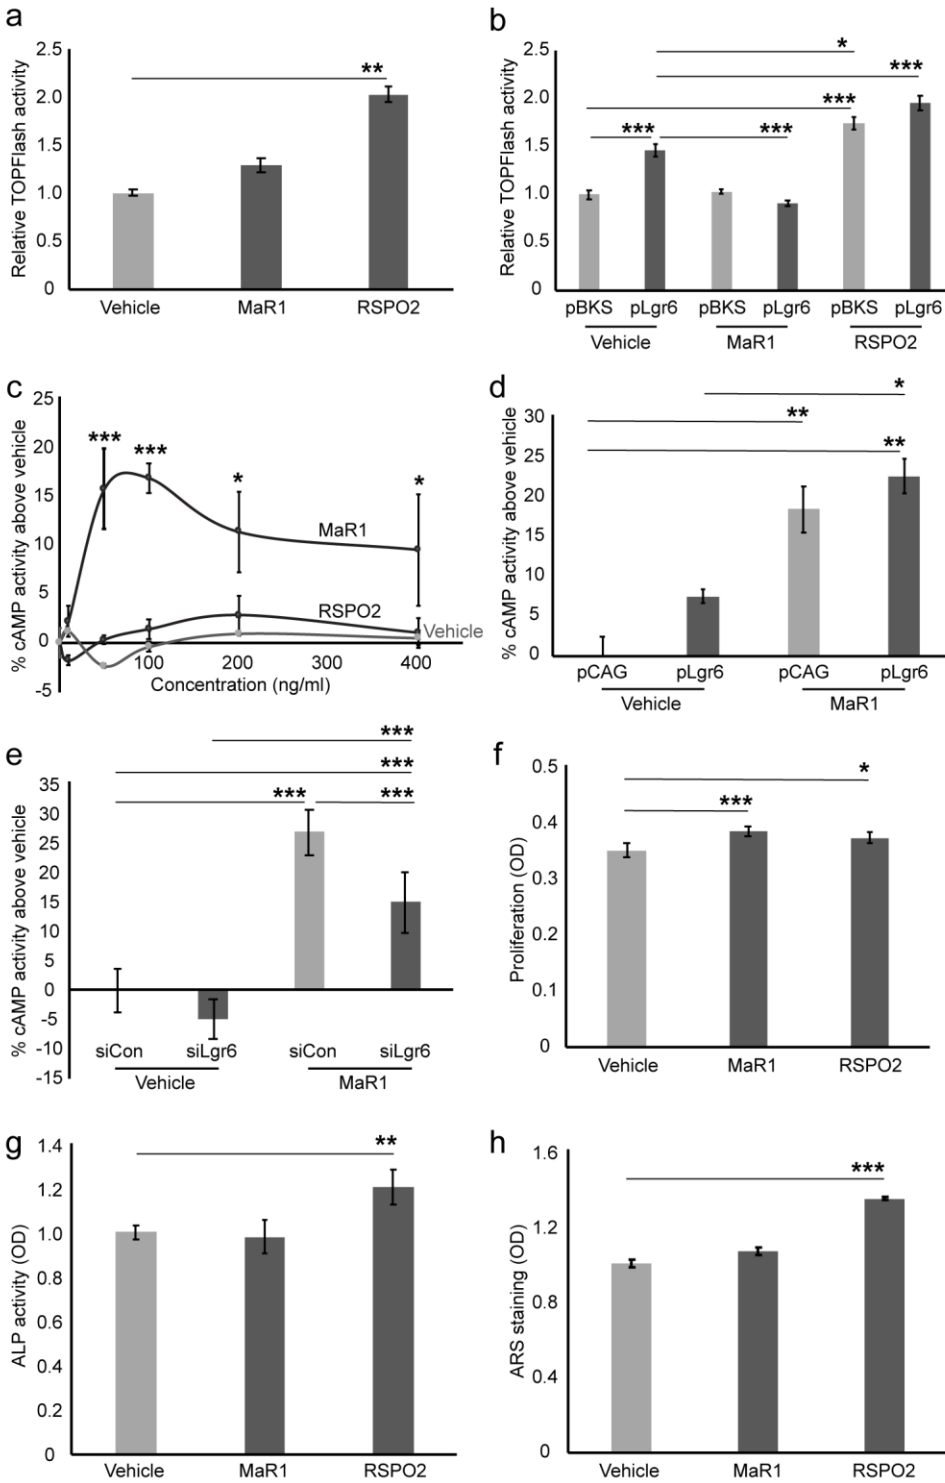

700

701
